# Supplementary material for: Identification of Cell Type-Specific Effects of DNMT3A Mutations on Relapse in Acute Myeloid Leukemia
Source: PubMed Central journal article supplement — Mol Cells. 2023 Sep 27;46(10):611–26. doi: 10.14348/molcells.2023.0093 (PMC10590706; doi:10.14348/molcells.2023.0093), 2023-09-27
Supplement: molce-46-10-611-supple1.pdf [file molce-46-10-611-supple1.pdf]

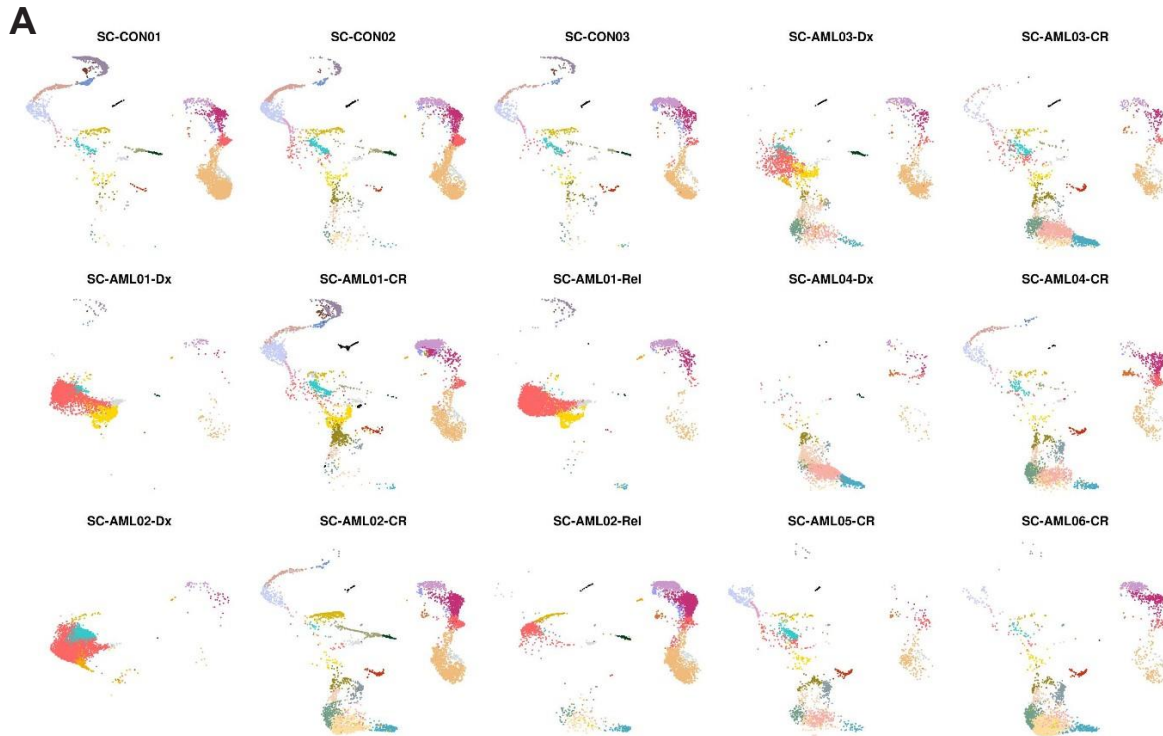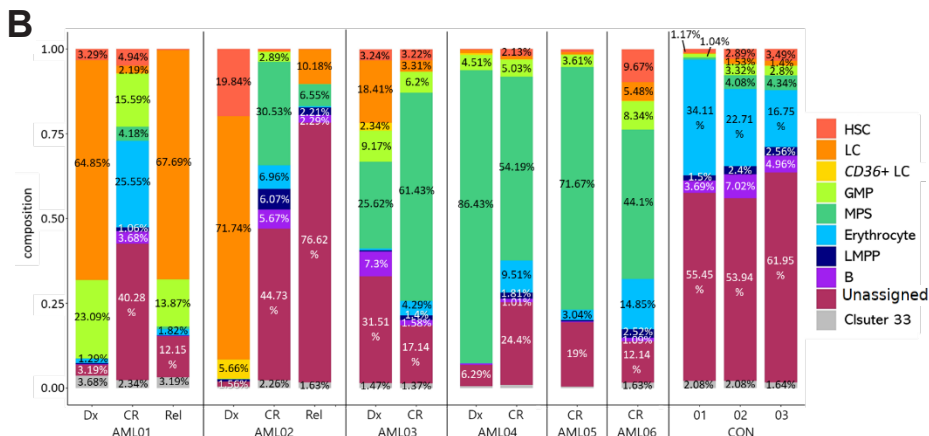

**Supplementary Figure 1. Cell type compositions in each sample.**

(A) UMAP projection showing the cell-type composition of all samples respectively. Each cluster is indicated with a different color in Figure 1b. HSC, hematopoietic stem cell; LC, leukemic cell; GMP, granulocyte-monocyte progenitor; Promono, promonocyte; Mono, monocyte; cDC, conventional dendritic cell; pDC, plasmacytoid dendritic cell; EPC, erythrocyte precursor cell; Pro-E, proerythroblast; baso-E, basophilic erythroblast; Poly-E, polychromatophilic erythroblast; ortho-E, orthochromatic erythroblast; LMPP, lymphoid-primed multipotential progenitor.

(B) The proportion of cell-types in each sample. The number above the graph indicates the percentage of the proportion. The Proportion percentage, which was less than 1%, were not indicated. GMP, cluster 3-4; MPS, cluster 5-13; Erythrocyte, cluster 14-20; B, cluster 22-24; T / NK, cluster 25-32. Dx, diagnosis; CR, complete remission; Rel, relapse; CON, healthy donor.

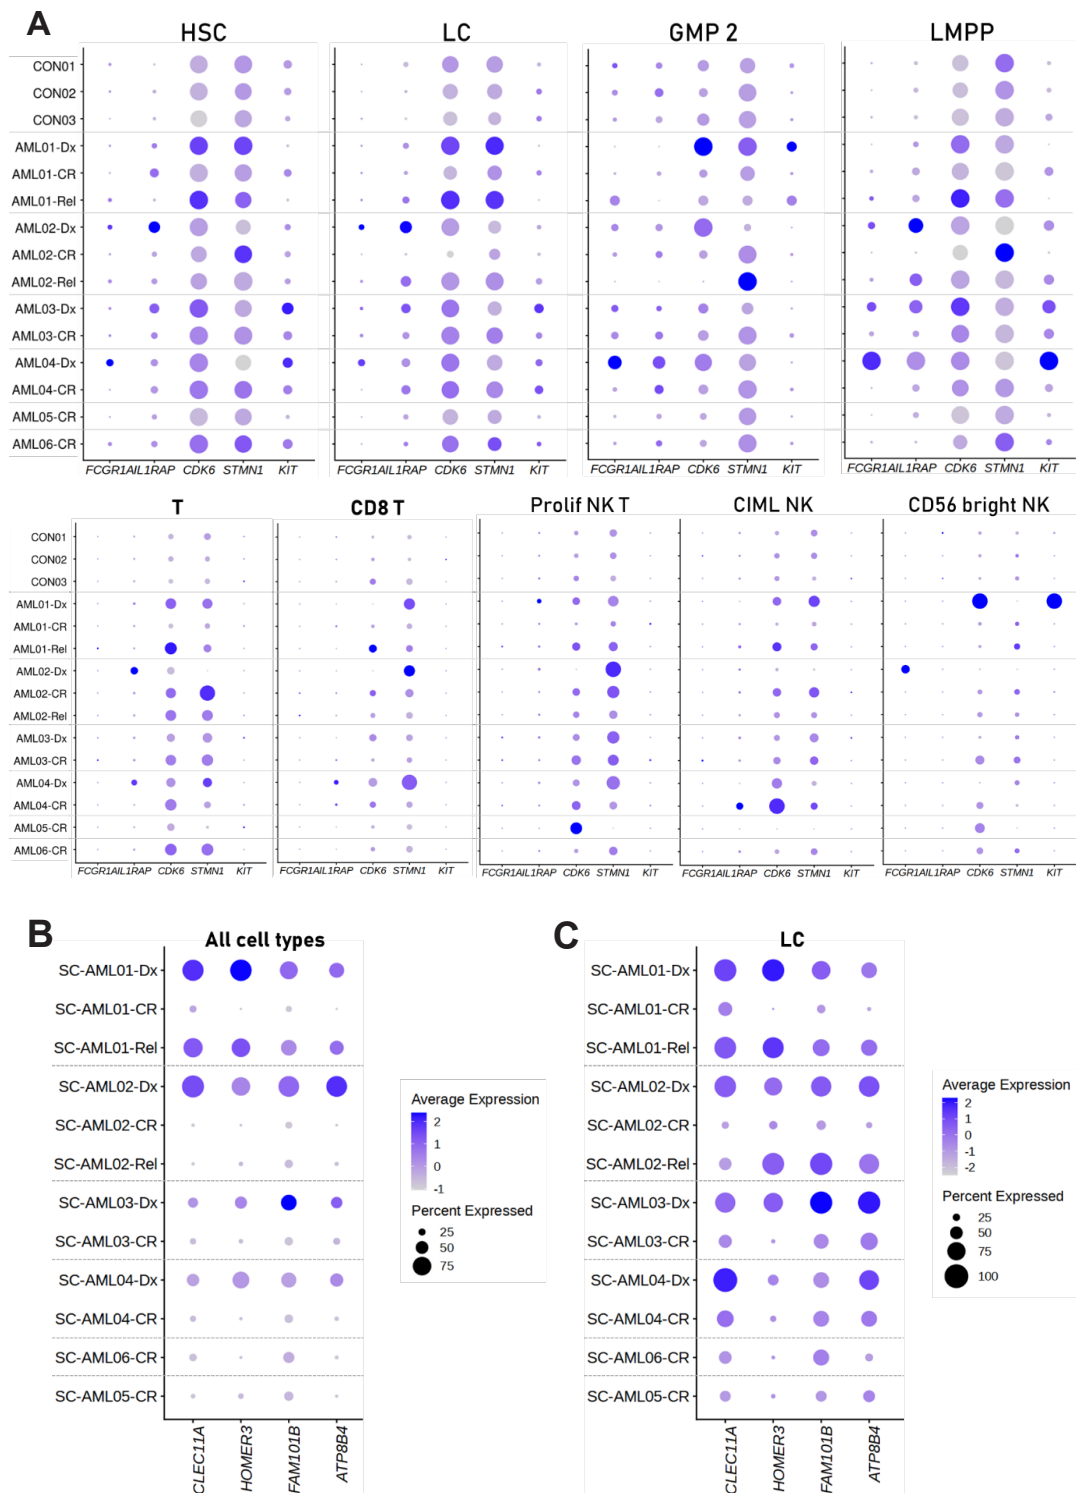

**Supplementary Figure 2. Candidate genes to distinguish between diagnosis, relapse and remission.**

(A) Dot plots showing expression of genes, reported to be highly expressed in AML, in HSC, LC, GMP2, LMPP, T, CD8 T, prolif NK T, CIML NK, and CD56 bright NK. (B-C) Dot plots showing expression of new candidate genes to distinguish complete remission from diagnosis and relapse in total cell types (B) or LC (C). Dot size represents the percentage of cells expressing the genes within the samples. Blue and white represent high and low expression, respectively.

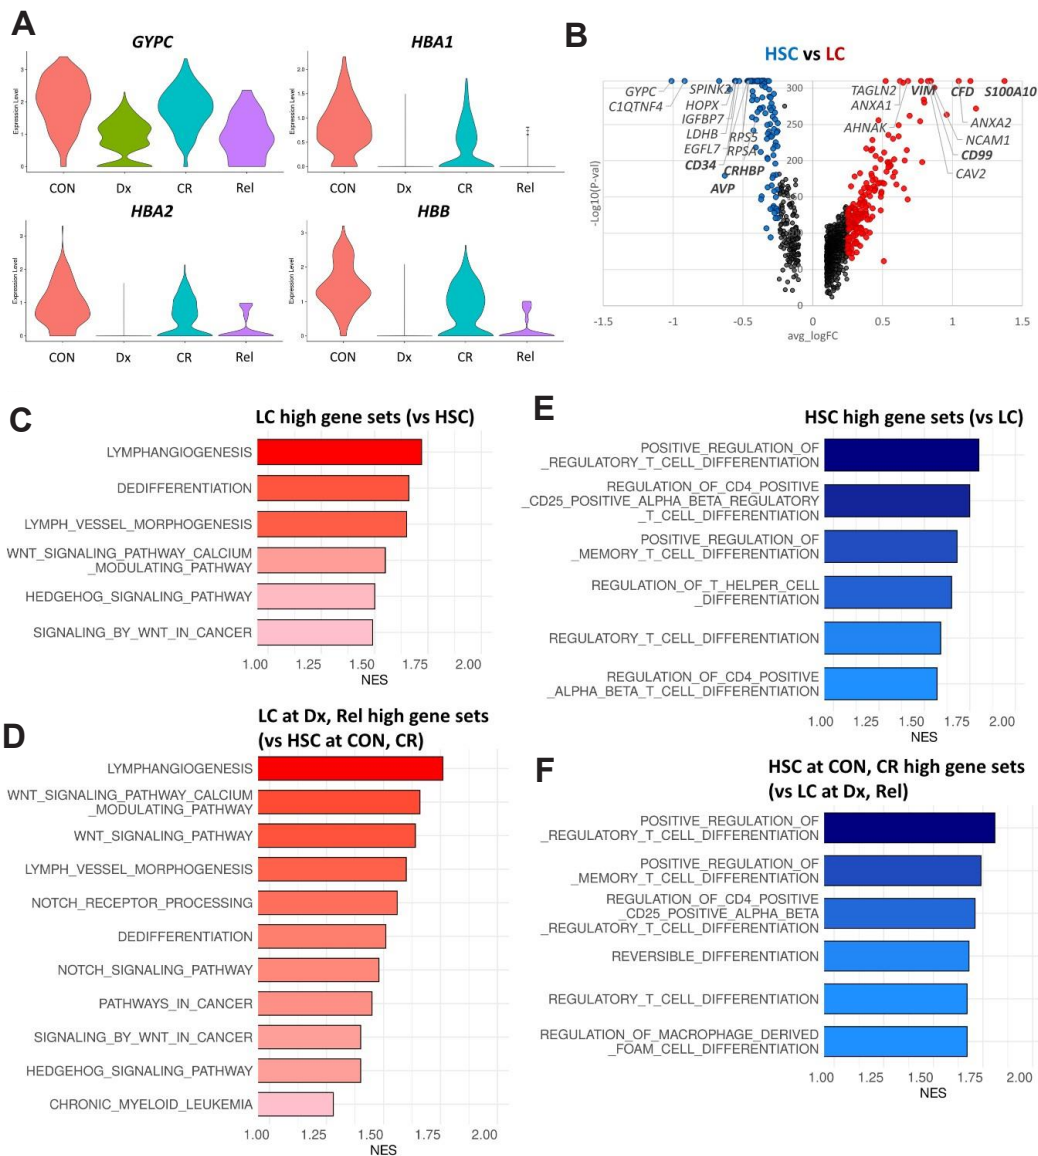

**Supplementary Figure 3. Transcriptional landscape of LC and heterogeneity of HSC, related to Figure 2.**

(A) Violin plot showing the expression of genes involved in red blood cell development in HSC over disease stages.

(B) Differentially expressed genes of LC vs HSC. X-axis represents the log<sub>2</sub> fold change, and y-axis represents -log<sub>10</sub>(P-value). Red dot indicates the upregulated genes in LC. Blue dot indicates the upregulated genes in HSC. Genes with a log<sub>2</sub> fold change of less than 0.25 were indicated by black dots. Known markers for each cell type are shown in bold.

(C) Significantly enriched gene sets associated with cancer or self-renewal in LC compared to HSC. Gene sets were filtered by p-value < 0.05 and FDR < 0.25 and ordered by NES. NES, normalized enrichment score; P, P-value; FDR, false discovery rate.

(D) Significantly enriched gene sets associated with cancer or self-renewal in LC at Dx, Rel compared to HSC at CON, CR.

(E) Significantly enriched gene sets associated with differentiation in HSC compared to LC.

(F) Significantly enriched gene sets associated with differentiation in HSC at CON, CR compared to LC at Dx, Rel.

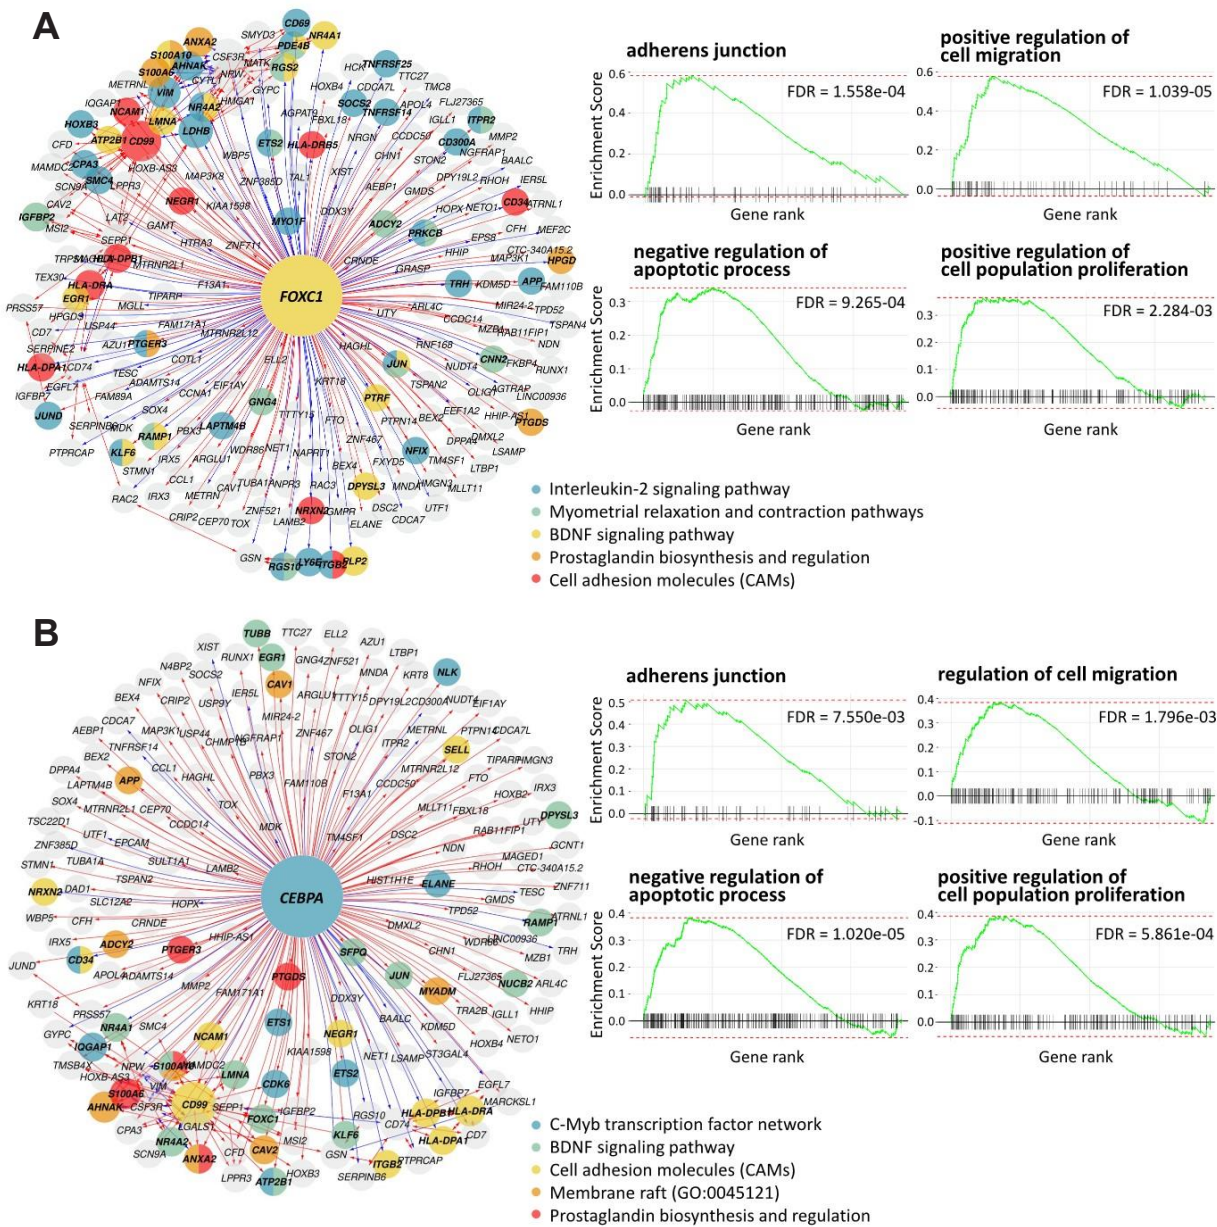

**Supplementary Figure 4. Virtual KO analysis of *FOXC1* and *CEBPA* on LC, related to Figure 2.**

(A-B) The egocentric plot (left) shows the interactions between *FOXC1* (A) or *CEBPA* (B) and virtual KO perturbed genes (FDR < 0.05). GSEA plots (right) show enriched functions associated with virtual KO perturbed genes upon the deletion of *FOXC1* (A) or *CEBPA* (B).



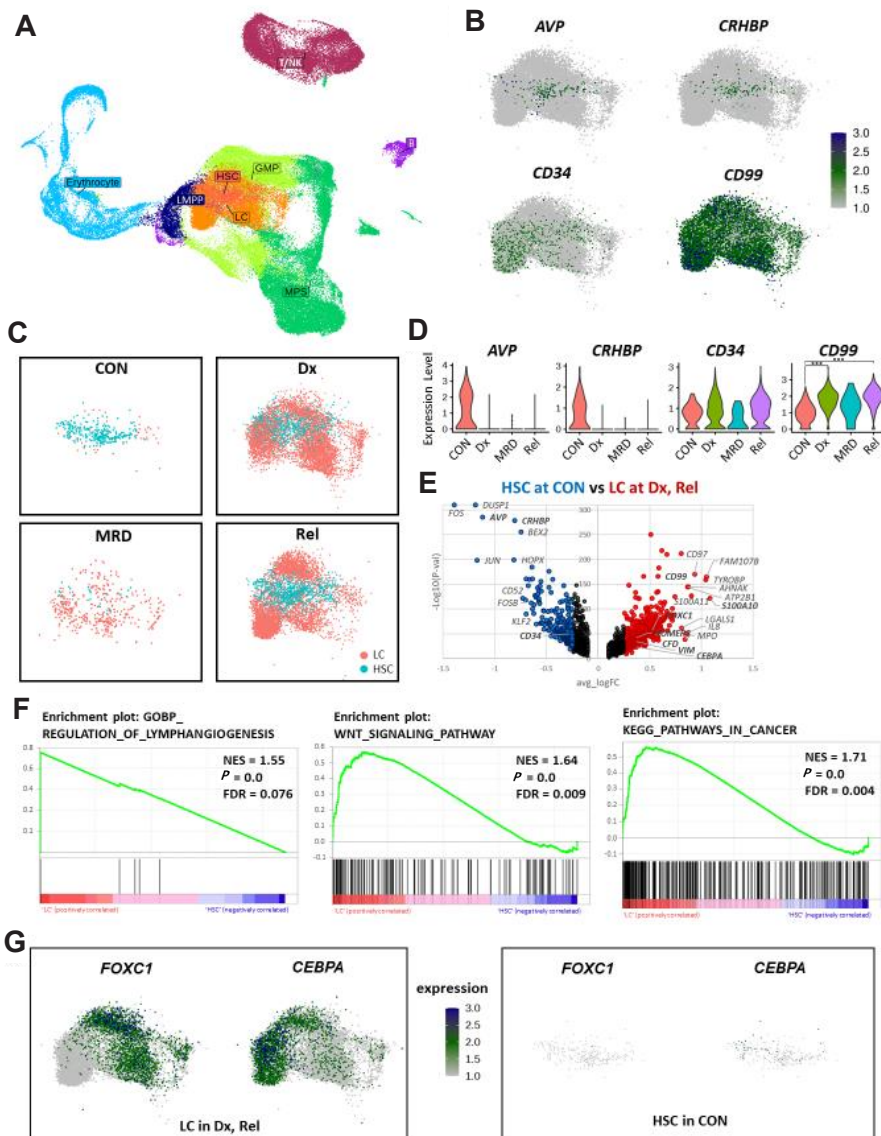

**Supplementary Figure 5. Analysis of public AML scRNAseq data for validation of the results in Figure 2.**

(A) UMAP visualization of public AML scRNAseq data (Dx 4, MRD 4, Rel 4) and our CON. Colors indicate cell types. Dx, diagnosis; MRD, minimal residual disease; Rel, relapse; CON, healthy donor; HSC, hematopoietic stem cell; LC, leukemic cell; GMP, granulocyte-monocyte progenitor; MPS, mononuclear phagocyte system; LMPP, lymphoid-primed multipotential progenitor.

(B) Expression of known HSC and LC marker genes in HSC and LC. *AVP*, *CRHBP*, and *CD34* for HSC, *CD99* for LC.

(C) UMAP visualization showing the distribution of HSCs and LCs by disease stage.

(D) Violin plot showing the expression of known HSC (*AVP*, *CRHBP*, *CD34*) and LC (*CD99*) marker genes in HSCs by disease stage. \*\*\**P*-value < 0.001 by Wilcoxon rank-sum test using FindMarkers function.

(E) DEGs in LCs at Dx and Rel vs. HSCs at CON. Red dots represent upregulated genes in LCs at Dx and Rel. Blue dots represent upregulated genes in HSCs at CON and CR. Black dots represent genes with a log<sub>2</sub> fold change < 0.25. Known markers of each cell-type and genes of interest are shown in bold.

(F) GSEA plots showing enrichment of cancer or stem cell associated gene sets in LCs at Dx and Rel compared to HSCs at CON. NES, normalized enrichment score; *P*, *P*-value; FDR, false discovery rate.

(G) Expression of *FOXC1* and *CEBPA* in LCs at Dx and Rel or HSCs at CON.

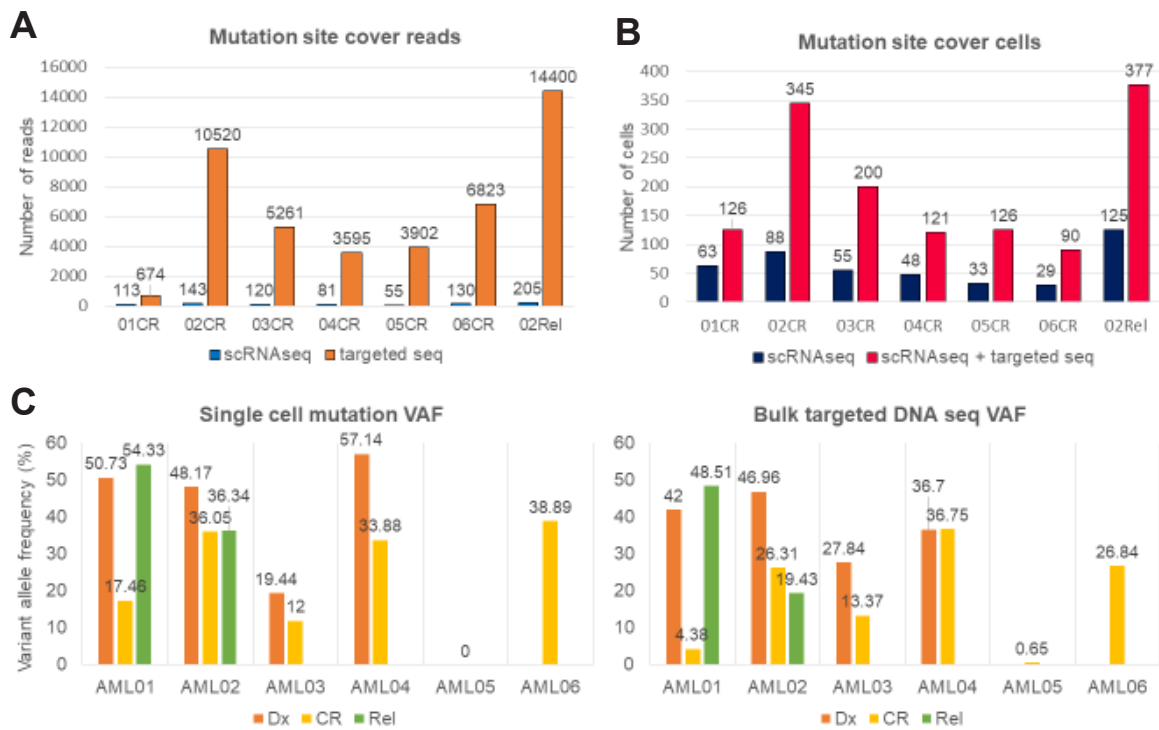

**Supplementary Figure 6. Integration of targeted seq with the existing scRNA-seq to increase the number of *DNMT3A* mutation site cover reads and cells.**

(A) The graph shows a comparison of the number of reads covering the mutation site in scRNA-seq and Targeted seq.

(B) The graph shows that the number of mutation site cover cells is improved by integrating scRNA-seq and targeted seq compared to scRNA-seq alone.

(C) Comparison of *DNMT3A* VAF in the single cell RNA (left) and bulk targeted DNA (right) sequencing data.

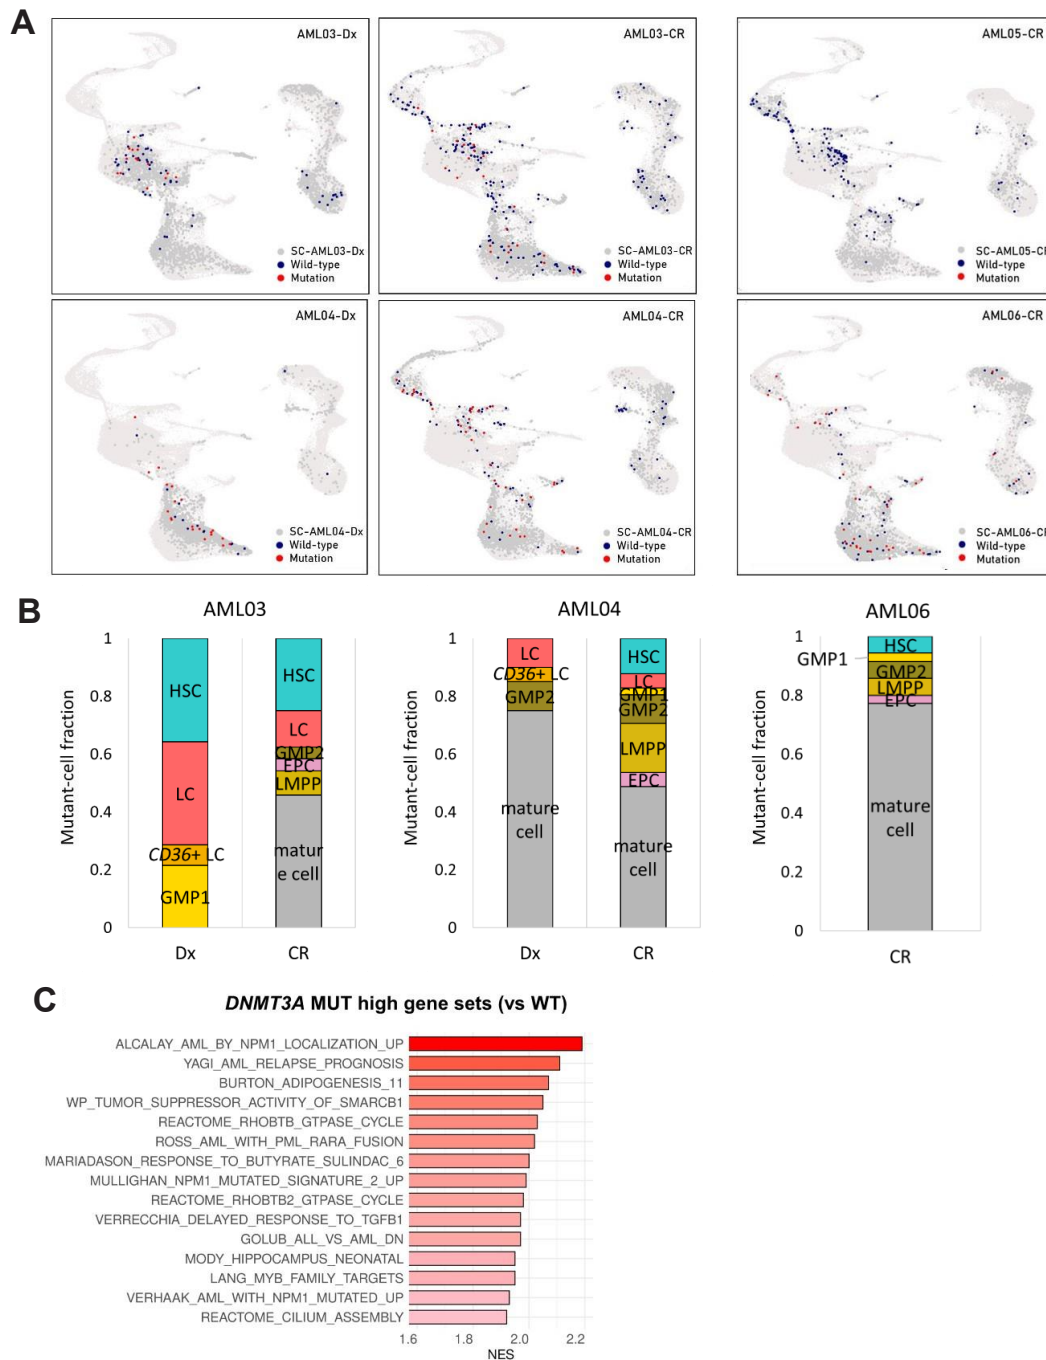

**Supplementary Figure 7. Identification of cell type and signatures of *DNMT3A* mutant cells, related to Figure 3.**

(A) Identification of *DNMT3A* mutant and WT cells in AML 03 – 06. red, *DNMT3A* mutant cell; navy, *DNMT3A* WT cell; dark gray, no coverage of *DNMT3A*.

(B) Fraction of *DNMT3A* mutant cells for each cluster in different time point samples of AML03, AML04 and AML06. There were no mutant cells detected at CR of AML05.

(C) Top 15 unregulated gene sets in *DNMT3A* mutant cells compared to WT cells in AML samples. Gene sets were filtered by  $p$ -value  $< 0.05$  and FDR  $< 0.25$  and ordered by NES. NES, normalized enrichment score; P,  $p$ -value; FDR, false discovery rate.

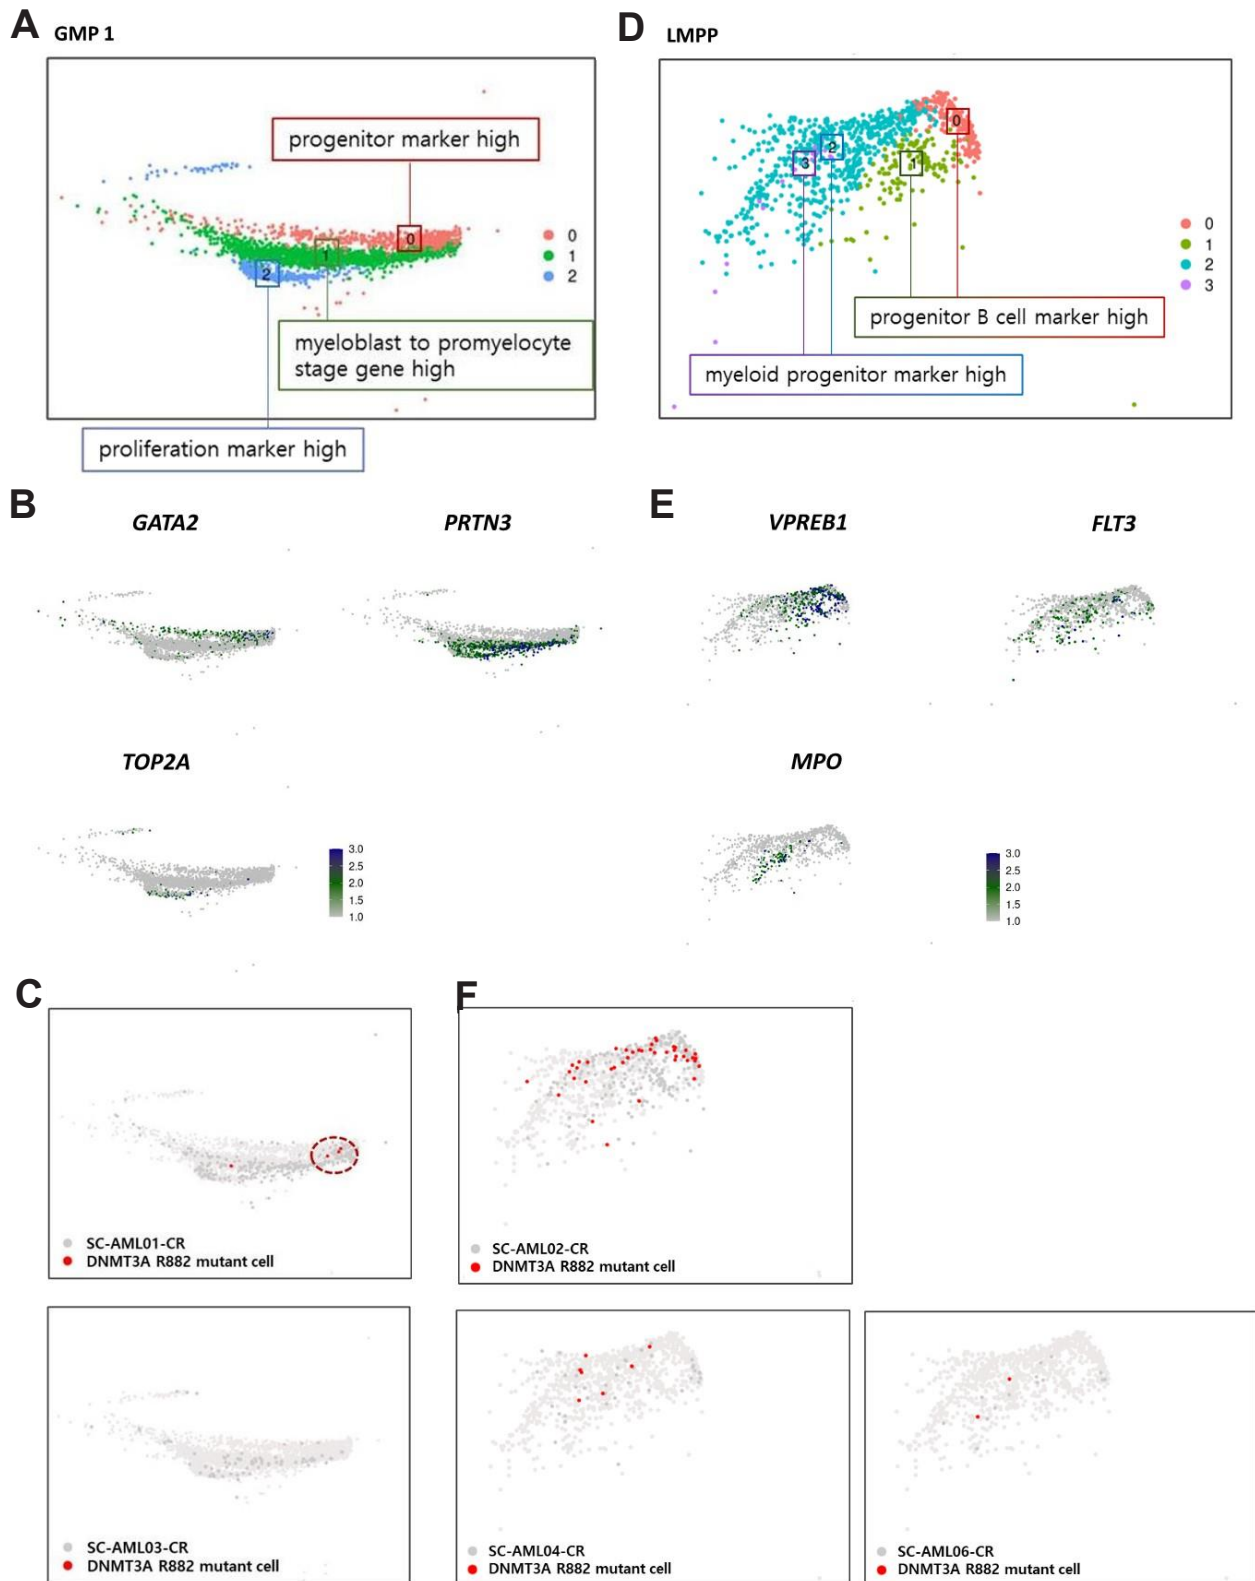



**Supplementary Figure 8. Subclustering of *DNMT3A* mutant cell rich cell-types at CR of AML01 and AML02.**

(A) UMAP projection showing subclusters of GMP1, a cell type *DNMT3A* mutant cell rich cell-type at CR in AML01.

(B) Expression levels of representative markers for subclusters of GMP1 are plotted onto UMAP at the middle. *GATA2* for progenitor marker high GMP1, *PRTN3* for myeloblast to promyelocyte stage gene high GMP1, *TOP2A* for proliferation marker high GMP1.

(C) UMAP projection shows the comparison of mutant cells in GMP1 (top) at CR between relapsed (AML01) and non-relapsed patients (AML03). Red dots indicate that at least one *DNMT3A* R882 mutant read was detected. Dark gray, no coverage of *DNMT3A*.

(D) UMAP projection showing subclusters of LMPP, a cell type *DNMT3A* mutant cell rich cell-type at CR in AML02.

(E) Expression levels of representative markers for subclusters of LMPP are plotted onto UMAP at the middle. *VPREB1* for progenitor B cell marker high LMPP, *FLT3* and *MPO* for myeloid progenitor marker high LMPP.

(F) UMAP projection shows the comparison of mutant cells in LMPP at CR between relapsed (AML02) and non-relapsed patients (AML04 and AML06). Red dots indicate that at least one *DNMT3A* R882 mutant read was detected. Dark gray, no coverage of *DNMT3A*.

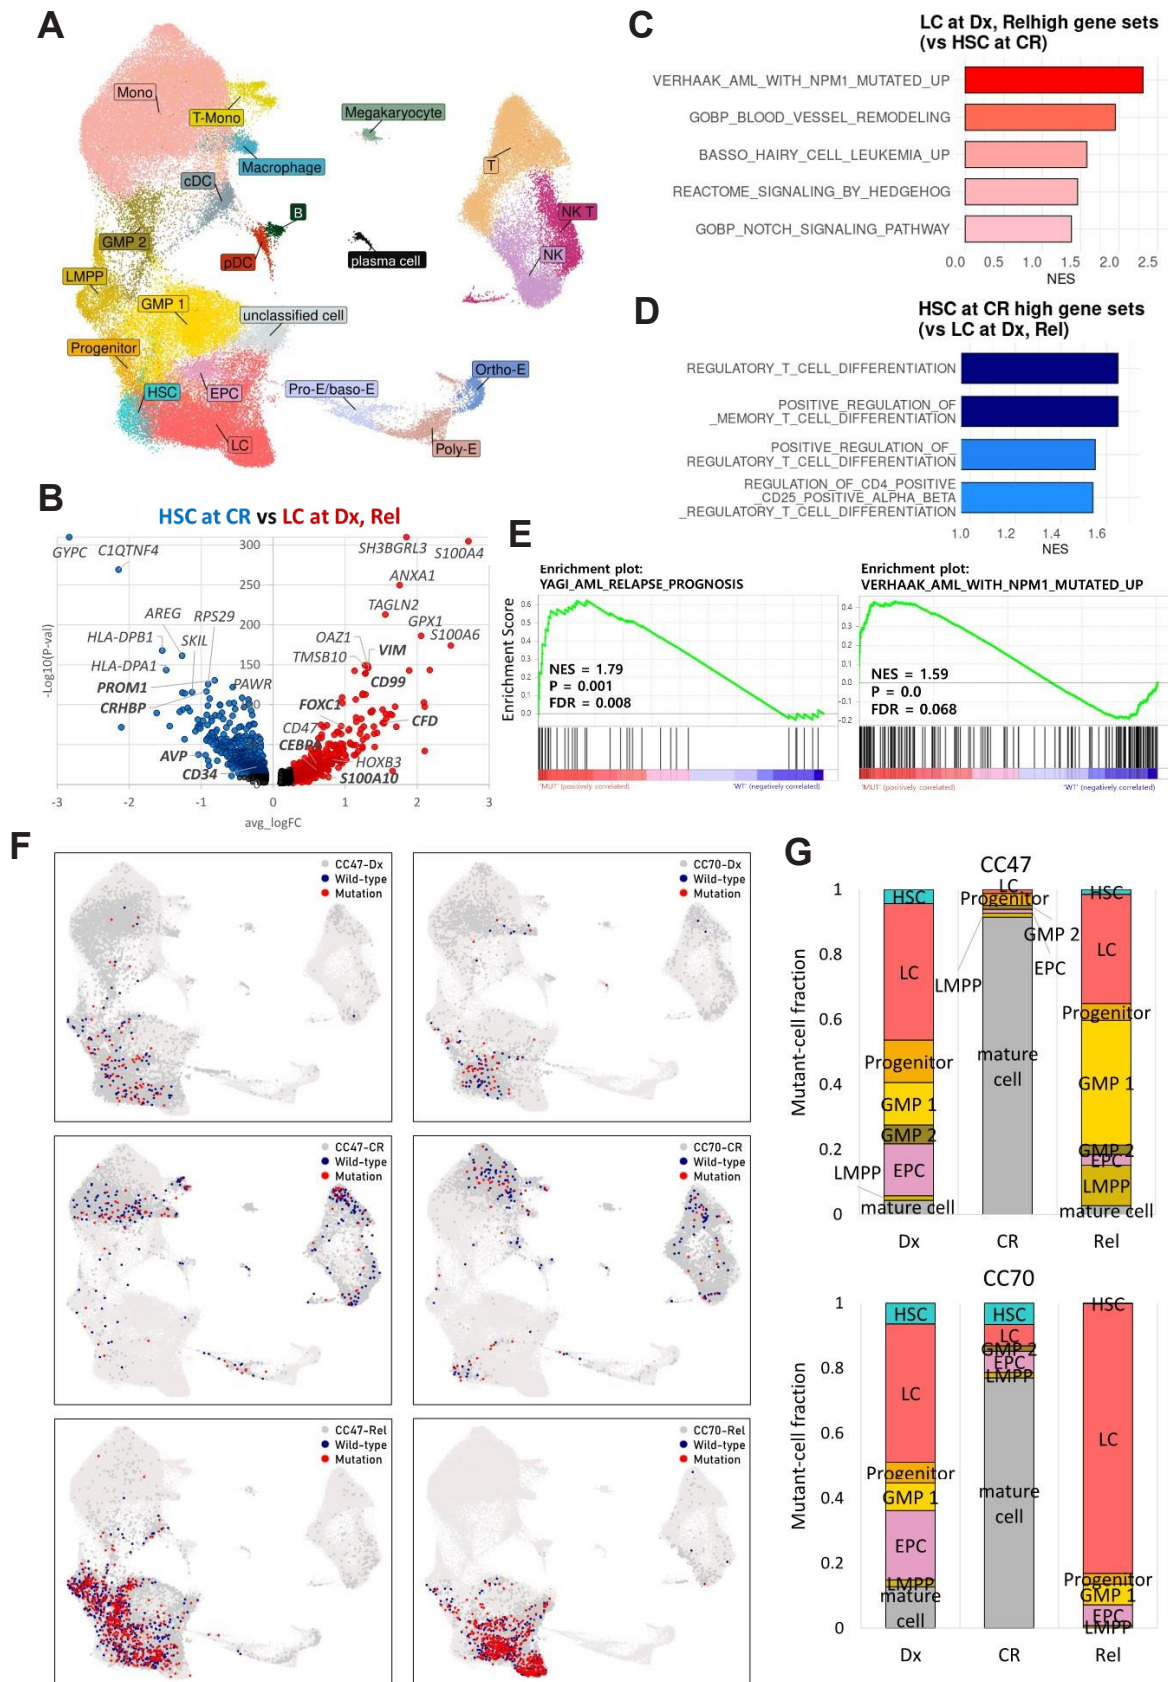

**Supplementary Figure 9. scRNAseq analysis of additional AML patients to examine if our results are reproducible or heterogeneous.**

(A) UMAP visualization of scRNAseq data from BM-MNCs of additional six AML patients. Colors indicate cell types. HSC, hematopoietic stem cell; LC, leukemic cell; GMP, granulocyte-monocyte progenitor; Mono, monocyte; cDC, conventional dendritic cell; pDC, plasmacytoid dendritic cell; EPC, erythrocyte precursor cell; Pro-E, proerythroblast; baso-E, basophilic erythroblast; Poly-E, polychromatophilic erythroblast; ortho-E, orthochromatic erythroblast; LMPP, lymphoid-primed multipotential progenitor.

(B) DEGs between *DNMT3A*-mutant and WT cells in HSC of additional AML samples. Red dots indicate upregulated genes in *DNMT3A*-mutant cells. Blue dots indicate downregulated genes. Black dots indicate genes with a log<sub>2</sub> fold change < 0.25. Genes of interest are marked in bold.

(C) Significantly enriched gene sets associated with cancer or self-renewal in LC compared to HSC of additional AML patients. Gene sets were filtered by p-value < 0.05 and FDR < 0.25 and ordered by NES. NES, normalized enrichment score; *P*, *P*-value; FDR, false discovery rate.

(D) Significantly enriched gene sets associated with differentiation in HSC compared to LC of additional patients.

(E) GSEA plots of enriched gene sets in *DNMT3A*-mutant cells compared to WT cells of additional patients.

(F) Plot showing *DNMT3A*-mutant and WT cells projected onto the UMAP cluster from CC47 and CC70 according to disease stages. Red, *DNMT3A*-mutant cell; navy, *DNMT3A*-WT cell; dark gray, no *DNMT3A* coverage.

(G) Fraction of *DNMT3A*-mutant cells in each cluster at different disease stages in CC47 and CC70. Mutant cell fraction: number of mutant cells in each cell-type divided by the total number of cells that cover the mutation site. Mature cell types excluding stem/progenitor cell types were merged.

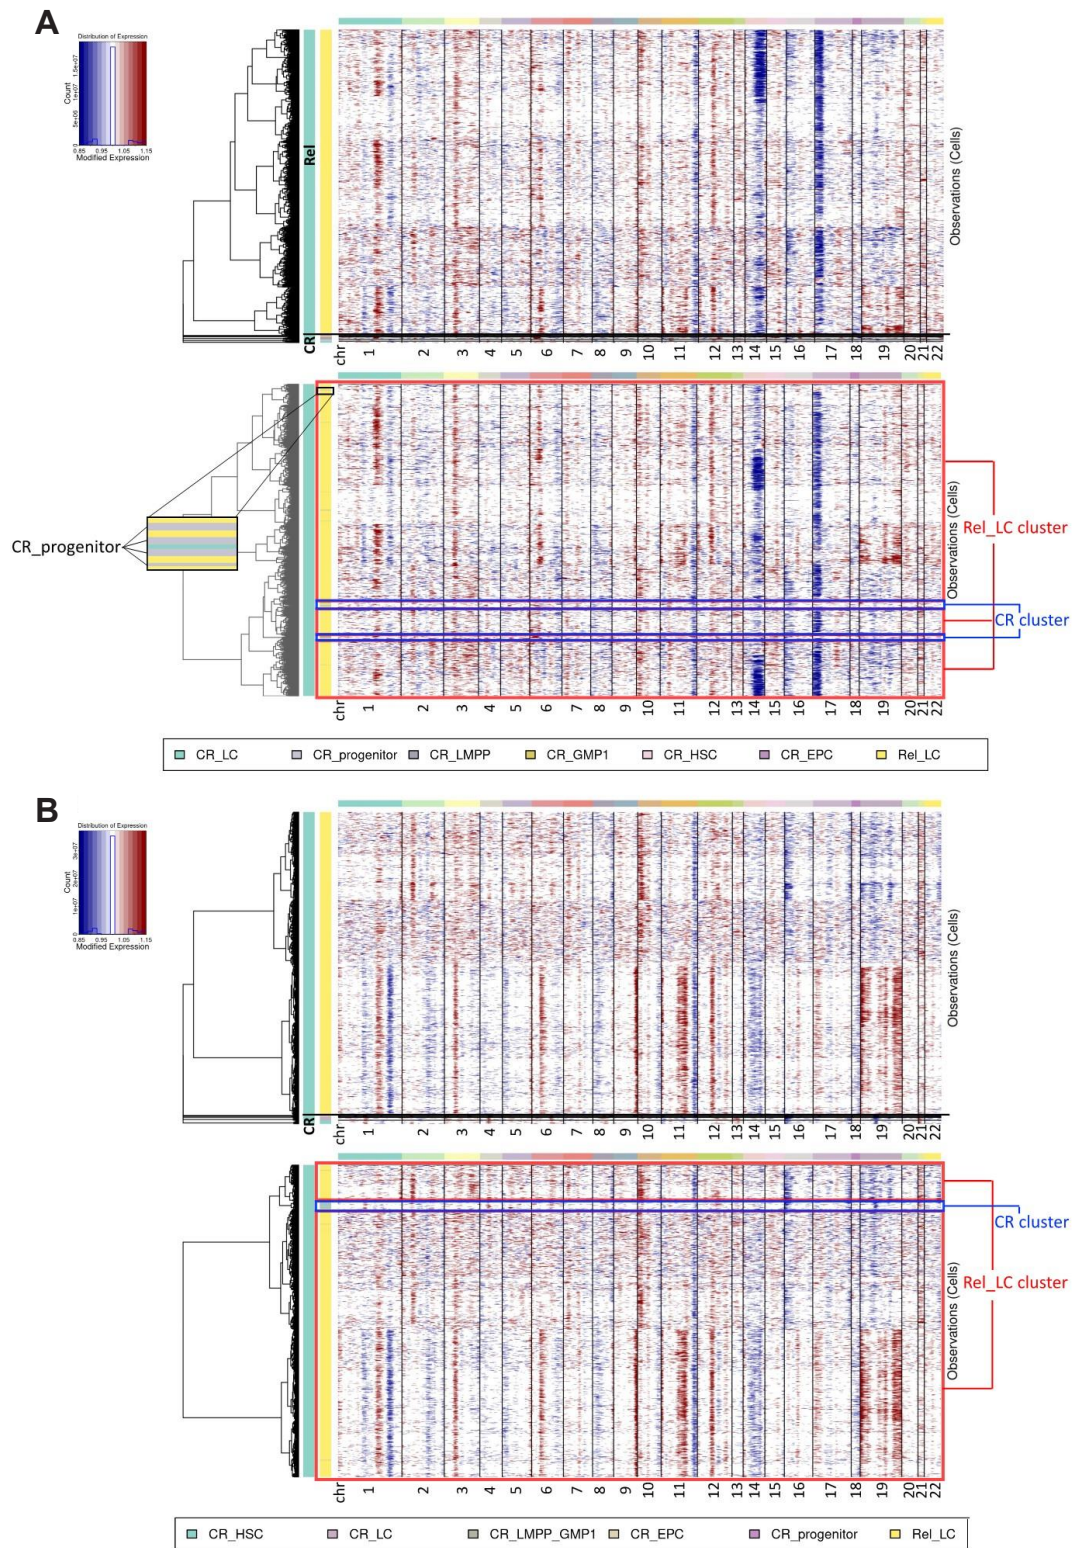

**Figure S10. CNV analysis to identify clone involved in relapse in additional patients with relapsed AML.**

(A, B) InferCNV heatmap of CR and Rel in CC47 (A) or CC70 (B). In the heatmaps on the top, cells are grouped by cell type. Cell types are labeled in different colors. In the heatmaps on the bottom, cells were ordered according to similar CNV patterns.



**Supplementary Table 1. Clinical Information of the patients/controls and sampling time.**

| Patients | Age/s<br>ex   | FAB                 |                                                     | Disease<br>status | Days<br>from Dx | %Blast | Sample extraction<br>Source                      | Further Treatment                                                                                                                                | Description of chemotherapy |
|----------|---------------|---------------------|-----------------------------------------------------|-------------------|-----------------|--------|--------------------------------------------------|--------------------------------------------------------------------------------------------------------------------------------------------------|-----------------------------|
|          |               | classifi-<br>cation |                                                     |                   |                 |        |                                                  |                                                                                                                                                  |                             |
| AML01    | 67/ma<br>le   | M1                  | Dx                                                  | 0                 | 91              | BM     | Intensive induction<br>chemotherapy              | Idarubicin (IDA) 12<br>mg/m <sup>2</sup> /day (D1-3)<br>Cytarabine (Ara-C) 100<br>mg/m <sup>2</sup> /day (D1-7)                                  |                             |
|          |               |                     | CR                                                  | 31                | 2.5             | BM     | Consolidation chemotherapy<br>for 3 cycles       | Ara-C 1.0 g/m <sup>2</sup> /12hours<br>(D1,3,5)<br>Fludarabine 30 mg/m <sup>2</sup> /day<br>(D1-5)                                               |                             |
|          |               |                     | Relapse<br>Death                                    | 378<br>749        | 80              | BM     | Intensive reinduction<br>chemotherapy            | Ara-C 2.0 g/m <sup>2</sup> /day (D1-5)                                                                                                           |                             |
| AML02    | 61/fe<br>male | M0                  | Dx                                                  | 0                 | 97              | BM     | Intensive induction<br>chemotherapy for 2 cycles | Fludarabine 25 mg/m <sup>2</sup> /day<br>(D1-4)<br>Ara-C 1.0 g/m <sup>2</sup> /day (D1-4)<br>IDA 5 mg/m <sup>2</sup> /day (D1-3)                 |                             |
|          |               |                     | CR                                                  | 112               | 0.8             | BM     | Consolidation chemotherapy<br>for 3 cycles       | Ara-C 2.0 g/m <sup>2</sup> /12hours<br>(D1,3,5)<br>Idarubicin (IDA) 12<br>mg/m <sup>2</sup> /day (D1-3)                                          |                             |
|          |               |                     | Relapse<br>Death                                    | 469<br>567        | 36              | BM     | Intensive reinduction<br>chemotherapy            | Cytarabine (Ara-C) 100<br>mg/m <sup>2</sup> /day (D1-7)                                                                                          |                             |
| AML03    | 63/fe<br>male | M4                  | Dx                                                  | 0                 | 66              | BM     | Intensive induction<br>chemotherapy              | IDA 12 mg/m <sup>2</sup> /day (D1-3)<br>Cytarabine (Ara-C) 100<br>mg/m <sup>2</sup> /day (D1-7)                                                  |                             |
|          |               |                     | CR                                                  | 33                | 2.1             | BM     | Consolidation chemotherapy<br>for 3 cycles       | Ara-C 1.0 g/m <sup>2</sup> /12hours<br>(D1,3,5)                                                                                                  |                             |
|          |               |                     | Alive                                               | 3,371             |                 |        |                                                  |                                                                                                                                                  |                             |
| AML04    | 56/ma<br>le   | M4                  | Dx                                                  | 0                 | 22              | BM     | Intensive induction<br>chemotherapy              | IDA 12 mg/m <sup>2</sup> /day (D1-3)<br>Cytarabine (Ara-C) 100<br>mg/m <sup>2</sup> /day (D1-7)                                                  |                             |
|          |               |                     | CR                                                  | 67                | 1               |        | Consolidation chemotherapy<br>for 3 cycles       | Ara-C 3.0 g/m <sup>2</sup> /12hours<br>(D1,3,5)                                                                                                  |                             |
|          |               |                     | After 3 <sup>rd</sup><br>consolid<br>ation<br>Alive | 207<br>3,164      | 0.5             | BM     |                                                  |                                                                                                                                                  |                             |
| AML05    | 65/ma<br>le   | M2                  | Dx                                                  | 0                 | 41              | BM     | Intensive induction<br>chemotherapy for 2 cycles | Fludarabine 25 mg/m <sup>2</sup> /day<br>(D1-4)<br>Ara-C 1.0 g/m <sup>2</sup> /day (D1-4)<br>Idarubicin (IDA) 5 mg/m <sup>2</sup> /day<br>(D1-3) |                             |
|          |               |                     | CR                                                  | 89                | 1.9             | BM     | Consolidation chemotherapy<br>for 3 cycles       | Ara-C 2.0 g/m <sup>2</sup> /12hours<br>(D1,3,5)<br>Idarubicin (IDA) 12<br>mg/m <sup>2</sup> /day (D1-3)                                          |                             |
|          |               |                     | Relapse<br>Death                                    | 364<br>679        | 11              |        | Re-induction therapy                             | Cytarabine (Ara-C) 100<br>mg/m <sup>2</sup> /day (D1-7)                                                                                          |                             |
| AML06    | 33/ma<br>le   | M4                  | Dx                                                  | 0                 | 57              |        | Intensive induction<br>chemotherapy              | Idarubicin (IDA) 12<br>mg/m <sup>2</sup> /day (D1-3)<br>Cytarabine (Ara-C) 100<br>mg/m <sup>2</sup> /day (D1-7)                                  |                             |
|          |               |                     | CR<br>Alive                                         | 33<br>4,903       | 4               | BM     | Consolidation chemotherapy<br>for 3 cycles       | Ara-C 3.0 g/m <sup>2</sup> /12hours<br>(D1,3,5)                                                                                                  |                             |
| Control1 | 21/fe<br>male |                     |                                                     |                   |                 | BM     |                                                  |                                                                                                                                                  |                             |
| Control2 | 44/ma<br>le   |                     |                                                     |                   |                 | BM     |                                                  |                                                                                                                                                  |                             |
| Control3 | 32/ma<br>le   |                     |                                                     |                   |                 | BM     |                                                  |                                                                                                                                                  |                             |

|      |           |    |         |     |    |    |                                                                                               |                                                                                                                                                                                                                                                                                                                        |
|------|-----------|----|---------|-----|----|----|-----------------------------------------------------------------------------------------------|------------------------------------------------------------------------------------------------------------------------------------------------------------------------------------------------------------------------------------------------------------------------------------------------------------------------|
| CC20 | 54/male   | M1 | Dx      |     |    | BM | Intensive induction chemotherapy, and re-induction therapy                                    | Daunorubicin 12 mg/m <sup>2</sup> /day (D1-3)<br>Ara-C 100 mg/m <sup>2</sup> /day (D1-7), and<br>Fludarabine 30 mg/m <sup>2</sup> /day (D1-5)<br>Ara-C 2.0 g/m <sup>2</sup> /day (D1-5)<br>Fludarabine 30 mg/m <sup>2</sup> /day (D1-5)                                                                                |
|      |           |    | CR      |     |    | BM |                                                                                               |                                                                                                                                                                                                                                                                                                                        |
| CC47 | 60/female | M0 | Dx      |     |    | BM | Intensive induction chemotherapy<br>Consolidation chemotherapy for 2cycles, and unrelated HCT | Daunorubicin 12 mg/m <sup>2</sup> /day (D1-3)<br>Ara-C 100 mg/m <sup>2</sup> /day (D1-7)<br><br>Ara-C 2.0 g/m <sup>2</sup> /12hours (D1,3,5)<br>Fludarabine 30 mg/m <sup>2</sup> /day (D1-5)                                                                                                                           |
|      |           |    | CR      |     |    | BM |                                                                                               |                                                                                                                                                                                                                                                                                                                        |
|      |           |    | Relapse |     |    |    |                                                                                               |                                                                                                                                                                                                                                                                                                                        |
| CC64 | 54/female | M4 | Dx      |     |    | BM | Intensive induction chemotherapy<br>Consolidation chemotherapy for 1 cycle, and sibling HCT   | Daunorubicin 12 mg/m <sup>2</sup> /day (D1-3)<br>Ara-C 100 mg/m <sup>2</sup> /day (D1-7)<br>Ara-C 2.0 g/m <sup>2</sup> /12hours (D1,3,5)                                                                                                                                                                               |
|      |           |    | CR      |     |    | BM |                                                                                               |                                                                                                                                                                                                                                                                                                                        |
| CC70 | 68/female | M4 | Dx      | 0   | 37 | BM | Intensive induction chemotherapy<br>Consolidation chemotherapy for 3 cycles                   | Daunorubicin 12 mg/m <sup>2</sup> /day (D1-3)<br>Ara-C 100 mg/m <sup>2</sup> /day (D1-7)<br>Ara-C 1.0 g/m <sup>2</sup> /12hours (D1,3,5)<br>Fludarabine 30 mg/m <sup>2</sup> /day (D1-5)<br>Ara-C 2.0 g/m <sup>2</sup> /day (D1-5), and<br>decitabine 20 mg/m <sup>2</sup> /day (D1-5)<br>venetoclax 200mg/day (D1-28) |
|      |           |    | CR      | 25  | 1  | BM |                                                                                               |                                                                                                                                                                                                                                                                                                                        |
|      |           |    | Relapse | 202 | 87 |    |                                                                                               |                                                                                                                                                                                                                                                                                                                        |
|      |           |    | Death   | 294 |    |    |                                                                                               |                                                                                                                                                                                                                                                                                                                        |
| CC76 | 49/male   | M5 | Dx      | 0   | 62 | BM | Intensive induction chemotherapy<br>Consolidation chemotherapy for 3 cycles                   | Daunorubicin 12 mg/m <sup>2</sup> /day (D1-3)<br>Ara-C 100 mg/m <sup>2</sup> /day (D1-7)<br>Ara-C 3.0 g/m <sup>2</sup> /12hours (D1,3,5)                                                                                                                                                                               |
|      |           |    | CR      | 49  | 2  | BM |                                                                                               |                                                                                                                                                                                                                                                                                                                        |
|      |           |    | Alive   | 782 |    |    |                                                                                               |                                                                                                                                                                                                                                                                                                                        |
| CC80 | 59/female | M2 | Dx      | 0   | 95 | BM | Intensive induction chemotherapy                                                              | Daunorubicin 12 mg/m <sup>2</sup> /day (D1-3)<br>Ara-C 100 mg/m <sup>2</sup> /day (D1-7)                                                                                                                                                                                                                               |
|      |           |    | CR      | 37  | 1  | BM | Consolidation chemotherapy for 3 cycles                                                       | Ara-C 3.0 g/m <sup>2</sup> /12hours (D1,3,5)                                                                                                                                                                                                                                                                           |

Abbreviations: FAB, French-American-British; Dx, diagnosis; BM, bone marrow; CR, complete remission; HCT, hematopoietic cell transplantation.

**Supplementary Table 2. Primer sequences for targeted sequencing of *DNMT3A*.**

| <b>Primer name</b> | <b>Primer Sequence (5' to 3')</b> | <b>Amplicon size</b> |
|--------------------|-----------------------------------|----------------------|
| Read1 (Forward)    | CTACACGACGCTCTTCCGATCT            |                      |
| DNMT3A_1_01cr      | GCGCAGAATGCTGGGTATTTGGTTTCCCAGTCC | 1553 bp              |
| DNMT3A_1_02cr      | ATCTTACCGAGGGGGTATTTGGTTTCCCAGTCC | 1553 bp              |
| DNMT3A_1_03cr      | TATGGTGTACCGGGGTATTTGGTTTCCCAGTCC | 1553 bp              |
| DNMT3A_1_04cr      | CGAACCTGTAGAGGGTATTTGGTTTCCCAGTCC | 1553 bp              |
| DNMT3A_1_05cr      | ATAGGCCACTGTGGGTATTTGGTTTCCCAGTCC | 1553 bp              |
| DNMT3A_1_06cr      | TCTCAGTGAAGCGGGTATTTGGTTTCCCAGTCC | 1553 bp              |
| DNMT3A_1_02rel     | GAGACTATCGTCGGGTATTTGGTTTCCCAGTCC | 1553 bp              |
| DNMT3A_2_01cr      | GCGCAGAATGCTACTGACGTCTCCAACATGAGC | 1527 bp              |
| DNMT3A_2_02cr      | ATCTTACCGAGGACTGACGTCTCCAACATGAGC | 1527 bp              |
| DNMT3A_2_03cr      | TATGGTGTACCGACTGACGTCTCCAACATGAGC | 1527 bp              |
| DNMT3A_2_04cr      | CGAACCTGTAGAACTGACGTCTCCAACATGAGC | 1527 bp              |
| DNMT3A_2_05cr      | ATAGGCCACTGTACTGACGTCTCCAACATGAGC | 1527 bp              |
| DNMT3A_2_06cr      | TCTCAGTGAAGCACTGACGTCTCCAACATGAGC | 1527 bp              |
| DNMT3A_2_02rel     | GAGACTATCGTCACTGACGTCTCCAACATGAGC | 1527 bp              |

**Supplementary Table 4. Mutation information at Dx and CR of patients.**

| Patient | Chr | Start     | End       | Ref | Alt  | Func.refGene | Gene.refGene | Dx_var_freq | CR_var_freq |
|---------|-----|-----------|-----------|-----|------|--------------|--------------|-------------|-------------|
| AML01   | 2   | 25457242  | 25457242  | C   | T    | exonic       | DNMT3A       | 42          | 4.38        |
|         | 4   | 106197378 | 106197378 | A   | G    | exonic       | TET2         | 46.07       | 2.51        |
|         | 5   | 170837543 | 170837543 | -   | TCTG | exonic       | NPM1         | 33.68       | 0           |
|         | 7   | 151875097 | 151875097 | T   | -    | splicing     | KMT2C        | 34.21       | 0           |
|         | 21  | 44514780  | 44514780  | C   | T    | exonic       | U2AF1        | 4.2         | 0           |
| AML02   | 2   | 25457242  | 25457242  | C   | T    | exonic       | DNMT3A       | 46.96       | 21.84       |
|         | 1   | 115258744 | 115258744 | C   | T    | exonic       | NRAS         | 43.85       | 0           |
|         | 2   | 209113113 | 209113113 | G   | A    | exonic       | IDH1         | 43.2        | 0.17        |
|         | 11  | 32413556  | 32413556  | T   | G    | exonic       | WT1          | 46.4        | 0.66        |
|         | X   | 39932019  | 39932019  | C   | -    | exonic       | BCOR         | 48.15       | 0.21        |
|         | X   | 70340966  | 70340966  | G   | A    | exonic       | MED12        | 45.87       | 0           |
| AML03   | 2   | 25457243  | 25457243  | G   | T    | exonic       | DNMT3A       | 27.84       | 1           |
|         | 4   | 106158269 | 106158269 | A   | -    | exonic       | TET2         | 17.72       | 0           |
|         | 4   | 106190770 | 106190770 | G   | T    | exonic       | TET2         | 32.7        | 0.99        |
|         | 5   | 170837543 | 170837543 | -   | TCTG | exonic       | NPM1         | 23.81       | 0           |
|         | 6   | 75857422  | 75857422  | A   | G    | exonic       | COL12A1      | 33.02       | 0.99        |
| AML04   | 2   | 25457242  | 25457242  | C   | T    | exonic       | DNMT3A       | 36.7        | 36.75       |
|         | 1   | 115258748 | 115258748 | C   | A    | exonic       | NRAS         | 32.24       | 0.12        |
|         | 4   | 106158444 | 106158444 | -   | A    | exonic       | TET2         | 25.87       | 0           |
|         | 4   | 106193931 | 106193931 | C   | T    | exonic       | TET2         | 28.75       | 0           |
|         | 5   | 170837543 | 170837543 | -   | TCTG | exonic       | NPM1         | 35.46       | 0           |
| AML05   | 2   | 25457242  | 25457242  | C   | T    | exonic       | DNMT3A       | 11.16       | 0.65        |
|         | 5   | 82817300  | 82817300  | G   | A    | exonic       | VCAN         | 8.67        | 0.17        |
|         | 15  | 90631934  | 90631934  | C   | T    | exonic       | IDH2         | 7.34        | 1.2         |
|         | X   | 39921391  | 39921391  | C   | T    | splicing     | BCOR         | 22.89       | 0           |
|         | X   | 129149392 | 129149392 | -   | ACGG | exonic       | BCORL1       | 7.77        | 0           |
| AML06   | 2   | 25457242  | 25457242  | C   | T    | exonic       | DNMT3A       | 27.21       | 26.84       |
|         | 5   | 170837543 | 170837543 | -   | TCTG | exonic       | NPM1         | 14.29       | 0           |
|         | 15  | 33842404  | 33842404  | C   | T    | exonic       | RYR3         | 22.3        | 0.53        |
|         | 15  | 90631934  | 90631934  | C   | T    | exonic       | IDH2         | 18.34       | 0           |



| Patient | Chr | Nucleotide                 | Amino acid      | Gene.refGene | Dx var freq | CR var freq |
|---------|-----|----------------------------|-----------------|--------------|-------------|-------------|
| CC20    | 2   | c.2644C>T                  | p. R882H        | DNMT3A       | 46.52       | 10.66       |
|         | 7   | c.4559C>T                  | p.A1520V        | MGA          | 48.86       | 49.32       |
|         | 15  | c.515G>A                   | p.R172K         | IDH2         | 43.37       | 0           |
|         | 21  | c.578A>G                   | p.H193R         | U2AF1        | 48.89       | 50.82       |
|         | X   | c.1288C>T                  | p.Q430*         | BCOR         | 93.89       | 0           |
| CC47    | 2   | c.2645G>A                  | p. R882C        | DNMT3A       | 47.94       | 26.85       |
|         | 5   | c.860_863dupTCTG           | p.W288fs        | NPM1         |             |             |
|         |     | c.1716_1793dupTGAAAGCCAGCT | p.Y597_E598insD |              |             |             |
|         |     | ACAGATGGTACAGGTGACCGGC     | ESQLQMVQVT      |              |             |             |
|         |     | TCCTCAGATAATGAGTACTTCTA    | GSSDNEYFYVD     |              |             |             |
|         | 13  | CGTTGATTTCAGAGAATATGA      | FREY            | FLT3         | 20.96       | 0           |
|         | 11  | c.2530A>C                  | p.S844R         | CBL          | 54.53       | 52.51       |
| CC64    | 11  | c.846G>C                   | p.K282N         | KMT2A        | 47.26       | 48.98       |
|         | 4   | c.4082G>A                  | p.G1361D        | TET2         | 46.24       | 0           |
|         | 2   | c.2645G>T                  | p. R882S        | DNMT3A       | 47.03       | 0           |
|         | 13  | c.2505T>G                  | p.D835E         | FLT3         | 42.71       | 0           |
|         | 5   | c.860_863dupTCTG           | p.W288fs        | NPM1         | 45.49       | 0           |
|         | 9   | c.302C>T                   | p.P101L         | CDKN2A       | 49.85       | 49.33       |
|         | 9   | c.3401A>G                  | p.Q1134R        | NOTCH1       | 46.32       | 49.54       |
| CC70    | 8   | c.1590_1591delGA           | p.K531fs        | RAD21        | 45.11       | 0           |
|         | 2   | c.2644C>T                  | p. R882H        | DNMT3A       | 46.58       | 26.35       |
|         |     | c.1773_1805dupCGTTGATTTCAG | p.L601_K602insN |              |             |             |
|         | 13  | AGAATATGAATATGATCTCAA      | VDFREYDYDL      | FLT3         | 13.02       | 0           |
|         | 2   | c.395G>A                   | p.R132H         | IDH1         | 10.96       | 0           |
|         | 15  | c.418C>T                   | p.R140W         | IDH2         | 16.56       | 0           |
|         | 5   | c.860_863dupTCTG           | p.W288fs        | NPM1         | 50.00       | 0           |
| CC76    | 1   | c.35G>C                    | p.G12A          | NRAS         | 5.22        | 0           |
|         | 7   | c.82T>G                    | p.L28V          | MGA          | 53.82       | 0           |
|         | 2   | c.2644C>T                  | p. R882H        | DNMT3A       | 45.66       | 7.59        |
|         | 13  | c.2503G>T                  | p.D835Y         | FLT3         | 2.22%       | 0           |
|         | 5   | c.860_863dupTCTG           | p.W288fs        | NPM1         | 41.35%      | 0           |
|         | 1   | c.34G>A                    | p.G12S          | NRAS         | 4.25%       | 0           |
|         | 4   | c.1421C>T                  | p.P474L         | TET2         | 50.68       | 48.79       |
| CC80    | 2   | c.2645G>A                  | p. R882C        | DNMT3A       | 0           | 1.36        |
|         | 5   | c.860_863dupTCTG           | p.W288fs        | NPM1         | 48.97       | 0           |
|         | 4   | c.556G>T                   | p.E186*         | TET2         | 47.2        | 0           |
|         | 7   | c.1795G>A                  | p.E599K         | CUX1         | 46.38       | 0           |

Chr, Chromosome number; Start, Start position; End, End position; Ref, Reference base(s); Alt, Alternate non-reference alleles called on at least one of the samples; Func.refGene, Regions (e.g., exonic, intronic, non-coding RNA)) that one variant hit; Gene.refGene, Gene name associated with one variant; Dx\_var\_freq, variant allele frequency in diagnosis; CR\_var\_freq, variant allele frequency in complete remission
